# Supplementary material for: Diverging Trends in Cause-Specific Mortality and Life Years Lost by Educational Attainment: Evidence from United States Vital Statistics Data, 1990-2010
Source: PubMed Central journal article supplement (PMC5049791; doi:10.1371/journal.pone.0163412), 2016-10-04
Supplement: pone.0163412.s001.pdf [file pone.0163412.s001.pdf]

**S1 Appendix. ICD codes used for cause of death grouping.**

| <b>Cause of death</b>                                                                                                                                                      | <b>ICD-9</b>               | <b>ICD-10</b>             |
|----------------------------------------------------------------------------------------------------------------------------------------------------------------------------|----------------------------|---------------------------|
| Infectious and parasitic diseases                                                                                                                                          | 0-139                      | A00-B99                   |
| Neoplasms (excluding smoking related)                                                                                                                                      | 140-149, 151-160, 163-239  | C16-C31, C35-D48          |
| Cardiovascular diseases                                                                                                                                                    | 390-429, 440-459           | I00-I59, I70-I99          |
| Cerebrovascular diseases                                                                                                                                                   | 430-438                    | I60-I69                   |
| Respiratory diseases (excluding smoking-related)                                                                                                                           | 460-489, 493-495, 497-519  | J00-J39, J45-J98          |
| Smoking-related diseases (cancers of the lip, oral cavity, pharynx, esophagus, larynx, trachea, lung, and bronchus; bronchitis, emphysema, and chronic airway obstruction) | 150, 161-162, 490-492, 496 | C00-C15, C32-C34, J40-J44 |
| Diabetes mellitus                                                                                                                                                          | 250                        | E10-E14                   |
| External                                                                                                                                                                   | E800-E999                  | V01-Y89                   |
| Other                                                                                                                                                                      | All remaining codes        | All remaining codes       |

Notes: Deaths in 1990 are classified under ICD-9 codes whereas deaths in 2000 and 2010 are classified under ICD-10; Smoking-related diseases include all causes where the smoking attributable fraction of deaths exceeds 65 percent in both genders combined (see main text for details).
