# Supplementary material for: Diverging Trends in Cause-Specific Mortality and Life Years Lost by Educational Attainment: Evidence from United States Vital Statistics Data, 1990-2010
Source: PubMed Central journal article supplement (PMC5049791; doi:10.1371/journal.pone.0163412), 2016-10-04
Supplement: pone.0163412.s002.pdf [file pone.0163412.s002.pdf]

**S2 Appendix. Midyear population estimates and number of deaths by gender, race, education, and cause.**

Table S2.1: Number of deaths by gender, education, and cause among non-Hispanic whites 1990-2010.

| Gender | Year | Education (years) | Midyear population | Infectious & parasitic | Neoplasms | Cardio-vascular | Respiratory | External | SRD*   | Cerebro-vascular | Diabetes | Other   | Total          |                |
|--------|------|-------------------|--------------------|------------------------|-----------|-----------------|-------------|----------|--------|------------------|----------|---------|----------------|----------------|
| Women  | 1990 | 0-11              | 12,070,975         | 4,782                  | 50,393    | 145,973         | 21,718      | 7,958    | 26,499 | 31,846           | 9,133    | 40,456  | <b>338,758</b> |                |
|        |      | 12                | 29,660,127         | 4,809                  | 68,766    | 126,089         | 18,395      | 11,120   | 35,536 | 27,089           | 7,899    | 39,059  | <b>338,762</b> |                |
|        |      | 13-15             | 11,799,518         | 1,255                  | 20,754    | 34,171          | 5,412       | 4,170    | 9,587  | 8,461            | 1,950    | 11,814  | <b>97,574</b>  |                |
|        |      | 16+               | 12,414,257         | 1,146                  | 17,701    | 27,371          | 4,524       | 3,361    | 6,697  | 6,847            | 1,385    | 9,663   | <b>78,695</b>  |                |
|        | 2000 | 0-11              | 8,281,916          | 5,902                  | 39,035    | 116,830         | 17,735      | 7,626    | 34,329 | 28,827           | 9,577    | 54,844  | <b>314,705</b> |                |
|        |      | 12                | 29,702,519         | 8,157                  | 76,638    | 144,219         | 22,043      | 13,408   | 58,494 | 36,431           | 11,917   | 72,190  | <b>443,497</b> |                |
|        |      | 13-15             | 14,961,916         | 2,278                  | 26,046    | 41,407          | 6,852       | 5,491    | 17,117 | 11,594           | 3,223    | 23,125  | <b>137,133</b> |                |
|        |      | 16+               | 17,494,138         | 1,719                  | 23,237    | 30,820          | 5,493       | 4,473    | 11,070 | 9,309            | 1,946    | 18,350  | <b>106,417</b> |                |
|        | 2010 | 0-11              | 5,571,690          | 4,994                  | 22,964    | 59,864          | 9,687       | 6,951    | 27,484 | 13,252           | 5,393    | 53,040  | <b>203,629</b> |                |
|        |      | 12                | 27,669,555         | 11,890                 | 75,870    | 130,562         | 20,968      | 20,044   | 68,986 | 30,703           | 11,503   | 120,234 | <b>490,760</b> |                |
|        |      | 13-15             | 17,318,233         | 3,854                  | 31,207    | 40,028          | 6,826       | 9,725    | 22,769 | 10,238           | 3,551    | 40,125  | <b>168,323</b> |                |
|        |      | 16+               | 22,305,450         | 2,609                  | 28,311    | 28,288          | 5,018       | 6,573    | 13,619 | 7,570            | 2,125    | 30,183  | <b>124,296</b> |                |
|        | Men  | 1990              | 0-11               | 10,347,168             | 5,286     | 50,007          | 136,718     | 19,789   | 16,708 | 53,952           | 20,322   | 6,210   | 33,682         | <b>342,674</b> |
|        |      |                   | 12                 | 23,733,128             | 8,218     | 51,194          | 117,884     | 13,826   | 24,346 | 47,453           | 15,230   | 5,784   | 29,985         | <b>313,920</b> |
|        |      |                   | 13-15              | 10,361,470             | 4,235     | 17,102          | 35,240      | 4,148    | 8,210  | 13,288           | 4,758    | 1,792   | 9,707          | <b>98,480</b>  |
|        |      |                   | 16+                | 15,252,000             | 5,508     | 22,584          | 42,340      | 5,372    | 7,961  | 13,502           | 5,886    | 1,853   | 11,702         | <b>116,708</b> |
| 2000   |      | 0-11              | 7,540,518          | 5,041                  | 38,290    | 95,180          | 14,343      | 13,861   | 48,120 | 16,734           | 6,977    | 35,732  | <b>274,278</b> |                |
|        |      | 12                | 24,812,189         | 7,667                  | 58,808    | 123,255         | 16,229      | 26,438   | 59,573 | 19,402           | 9,483    | 46,900  | <b>367,755</b> |                |
|        |      | 13-15             | 13,467,696         | 2,742                  | 22,388    | 40,897          | 5,343       | 9,745    | 18,825 | 6,838            | 3,376    | 16,803  | <b>126,957</b> |                |
|        |      | 16+               | 18,946,760         | 3,083                  | 30,758    | 49,345          | 7,071       | 9,526    | 18,590 | 8,944            | 3,572    | 20,957  | <b>151,846</b> |                |
| 2010   |      | 0-11              | 5,605,093          | 4,593                  | 25,079    | 53,984          | 9,052       | 12,273   | 34,513 | 8,202            | 5,104    | 34,352  | <b>187,152</b> |                |
|        |      | 12                | 25,232,736         | 10,142                 | 64,643    | 115,606         | 16,887      | 36,526   | 68,025 | 16,470           | 11,093   | 72,261  | <b>411,653</b> |                |
|        |      | 13-15             | 15,233,235         | 4,006                  | 29,693    | 45,122          | 6,529       | 15,551   | 24,563 | 6,743            | 4,517    | 29,304  | <b>166,028</b> |                |
|        |      | 16+               | 22,063,609         | 3,957                  | 38,765    | 51,322          | 8,352       | 13,381   | 21,156 | 8,546            | 4,370    | 36,884  | <b>186,733</b> |                |

Notes: Number of deaths averaged over ten imputations; \*SRD = smoking-related diseases (bronchitis, emphysema, chronic airway obstruction and cancers of the lip, oral cavity, pharynx, esophagus, larynx, trachea, lung, and bronchus).

Table S2.2: Number of deaths by gender, education, and cause among non-Hispanic blacks 1990-2010.

| Gender       | Year        | Education (years) | Midyear population | Infectious & parasitic | Neoplasms | Cardio-vascular | Respiratory | External | SRD*  | Cerebro-vascular | Diabetes | Other  | Total         |               |
|--------------|-------------|-------------------|--------------------|------------------------|-----------|-----------------|-------------|----------|-------|------------------|----------|--------|---------------|---------------|
| <b>Women</b> | <b>1990</b> | <b>0-11</b>       | 2,687,518          | 1,878                  | 9,628     | 24,323          | 2,814       | 1,707    | 3,278 | 5,824            | 2,876    | 8,287  | <b>60,615</b> |               |
|              |             | <b>12</b>         | 3,802,307          | 1,543                  | 6,744     | 11,704          | 1,476       | 1,812    | 2,400 | 2,619            | 1,530    | 4,778  | <b>34,606</b> |               |
|              |             | <b>13-15</b>      | 1,503,842          | 416                    | 1,966     | 2,554           | 370         | 589      | 555   | 626              | 327      | 1,180  | <b>8,583</b>  |               |
|              |             | <b>16+</b>        | 1,067,580          | 256                    | 1,579     | 2,213           | 293         | 334      | 378   | 578              | 266      | 950    | <b>6,847</b>  |               |
|              | <b>2000</b> | <b>0-11</b>       | 2,195,391          | 2,586                  | 8,190     | 21,489          | 2,591       | 1,388    | 3,974 | 5,467            | 3,372    | 9,906  | <b>58,963</b> |               |
|              |             | <b>12</b>         | 4,640,971          | 2,628                  | 8,738     | 15,891          | 1,929       | 1,822    | 4,319 | 3,702            | 2,636    | 7,450  | <b>49,115</b> |               |
|              |             | <b>13-15</b>      | 2,442,581          | 735                    | 3,196     | 4,362           | 564         | 728      | 1,258 | 1,098            | 711      | 2,219  | <b>14,871</b> |               |
|              |             | <b>16+</b>        | 1,676,881          | 390                    | 2,411     | 3,120           | 415         | 382      | 814   | 821              | 477      | 1,630  | <b>10,460</b> |               |
|              | <b>2010</b> | <b>0-11</b>       | 1,822,174          | 1,891                  | 5,971     | 12,916          | 1,672       | 1,008    | 3,473 | 3,083            | 2,098    | 10,581 | <b>42,693</b> |               |
|              |             | <b>12</b>         | 4,810,855          | 2,610                  | 10,163    | 15,832          | 2,100       | 1,962    | 5,482 | 3,586            | 2,708    | 11,335 | <b>55,778</b> |               |
|              |             | <b>13-15</b>      | 3,595,970          | 968                    | 5,143     | 5,895           | 778         | 1,094    | 2,144 | 1,340            | 1,099    | 4,304  | <b>22,765</b> |               |
|              |             | <b>16+</b>        | 2,532,915          | 476                    | 3,250     | 3,419           | 472         | 520      | 1,083 | 895              | 511      | 2,859  | <b>13,485</b> |               |
|              | <b>Men</b>  | <b>1990</b>       | <b>0-11</b>        | 2,248,211              | 2,974     | 11,145          | 23,329      | 3,426    | 5,324 | 9,412            | 4,723    | 1,650  | 8,717         | <b>70,700</b> |
|              |             |                   | <b>12</b>          | 3,174,672              | 3,466     | 5,708           | 11,385      | 1,680    | 6,068 | 4,620            | 2,004    | 959    | 5,279         | <b>41,169</b> |
|              |             |                   | <b>13-15</b>       | 1,097,340              | 1,236     | 1,328           | 2,680       | 360      | 1,572 | 950              | 452      | 227    | 1,281         | <b>10,086</b> |
|              |             |                   | <b>16+</b>         | 808,280                | 834       | 1,110           | 1,843       | 272      | 697   | 620              | 337      | 166    | 822           | <b>6,701</b>  |
| <b>2000</b>  |             | <b>0-11</b>       | 1,974,633          | 3,115                  | 8,822     | 17,762          | 2,483       | 3,735    | 8,170 | 3,977            | 1,982    | 7,693  | <b>57,739</b> |               |
|              |             | <b>12</b>         | 4,089,879          | 4,013                  | 7,533     | 15,088          | 1,819       | 5,760    | 6,399 | 2,772            | 1,855    | 6,993  | <b>52,232</b> |               |
|              |             | <b>13-15</b>      | 1,840,865          | 1,057                  | 2,081     | 3,914           | 430         | 1,671    | 1,431 | 691              | 507      | 1,806  | <b>13,588</b> |               |
|              |             | <b>16+</b>        | 1,197,480          | 659                    | 1,716     | 2,818           | 306         | 718      | 888   | 500              | 370      | 1,156  | <b>9,131</b>  |               |
| <b>2010</b>  |             | <b>0-11</b>       | 1,799,402          | 1,970                  | 6,580     | 11,964          | 1,685       | 2,916    | 5,887 | 2,323            | 1,682    | 7,453  | <b>42,460</b> |               |
|              |             | <b>12</b>         | 4,668,822          | 3,399                  | 9,675     | 17,271          | 1,958       | 6,263    | 7,511 | 3,015            | 2,486    | 9,401  | <b>60,979</b> |               |
|              |             | <b>13-15</b>      | 2,617,390          | 1,074                  | 3,487     | 5,679           | 575         | 2,063    | 2,109 | 937              | 899      | 3,034  | <b>19,857</b> |               |
|              |             | <b>16+</b>        | 1,691,059          | 544                    | 2,311     | 3,363           | 377         | 785      | 1,009 | 584              | 512      | 1,816  | <b>11,301</b> |               |

Notes: Number of deaths averaged over ten imputations; \*SRD = smoking-related diseases (bronchitis, emphysema, chronic airway obstruction and cancers of the lip, oral cavity, pharynx, esophagus, larynx, trachea, lung, and bronchus).
