# Supplementary material for: Diverging Trends in Cause-Specific Mortality and Life Years Lost by Educational Attainment: Evidence from United States Vital Statistics Data, 1990-2010
Source: PubMed Central journal article supplement (PMC5049791; doi:10.1371/journal.pone.0163412), 2016-10-04
Supplement: pone.0163412.s003.pdf [file pone.0163412.s003.pdf]

**S3 Appendix. Results for non-Hispanic blacks.**

Fig S3.1. Age decomposition of change in life expectancy by gender and years of schooling, non-Hispanic blacks 1990-2010.

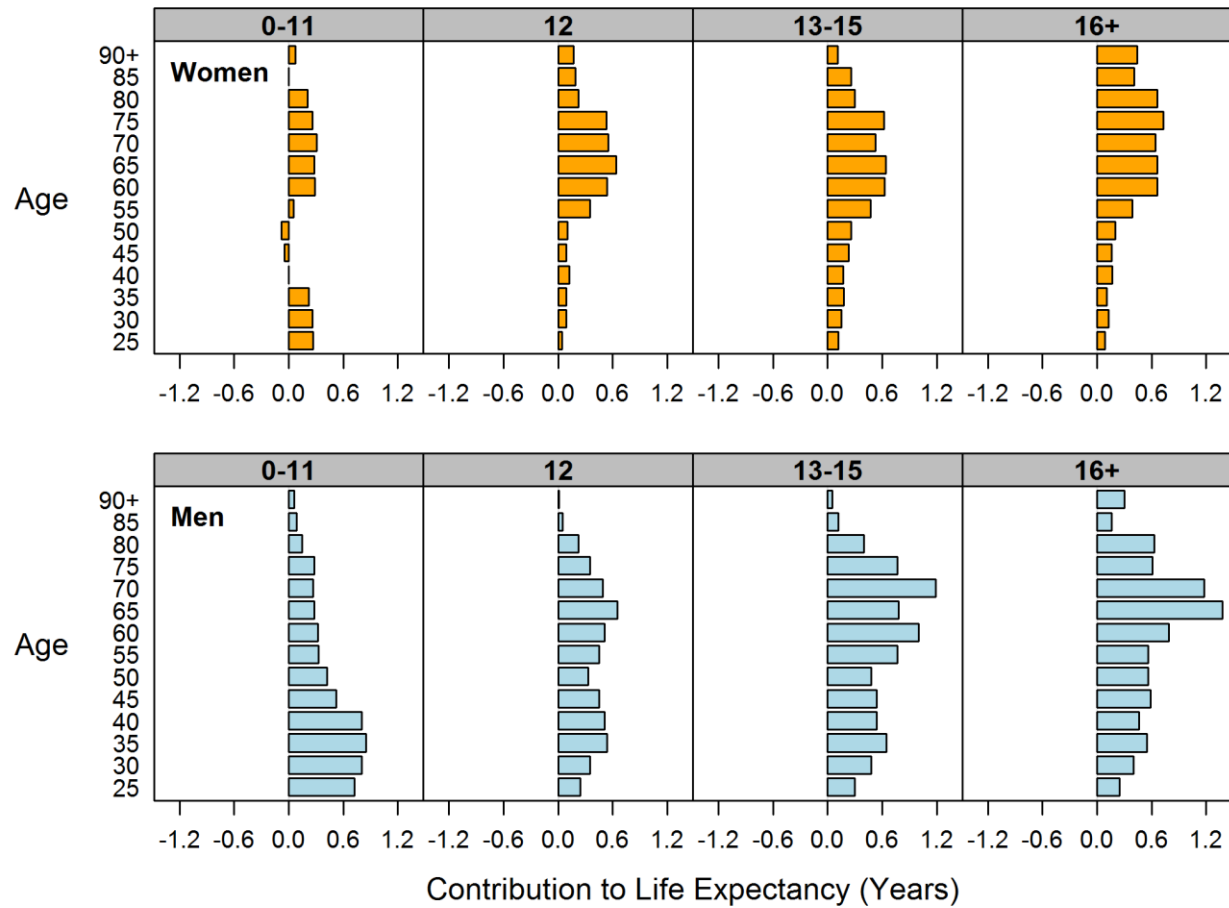

Fig S3.2. Total life years lost between ages 25 and 85 by gender and years of schooling, non-Hispanic blacks 1990-2010.

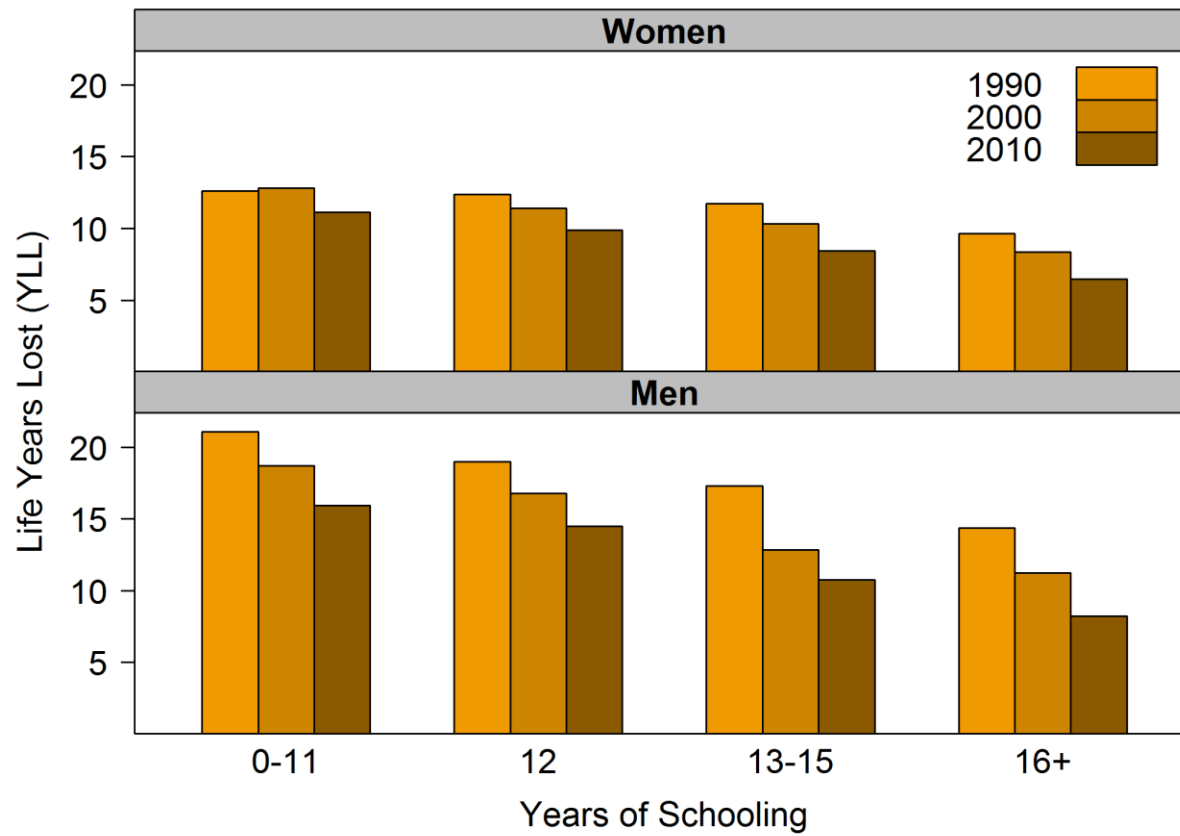

Fig S3.3. Life years lost between ages 25 and 85 by cause of death and years of schooling, non-Hispanic black women.

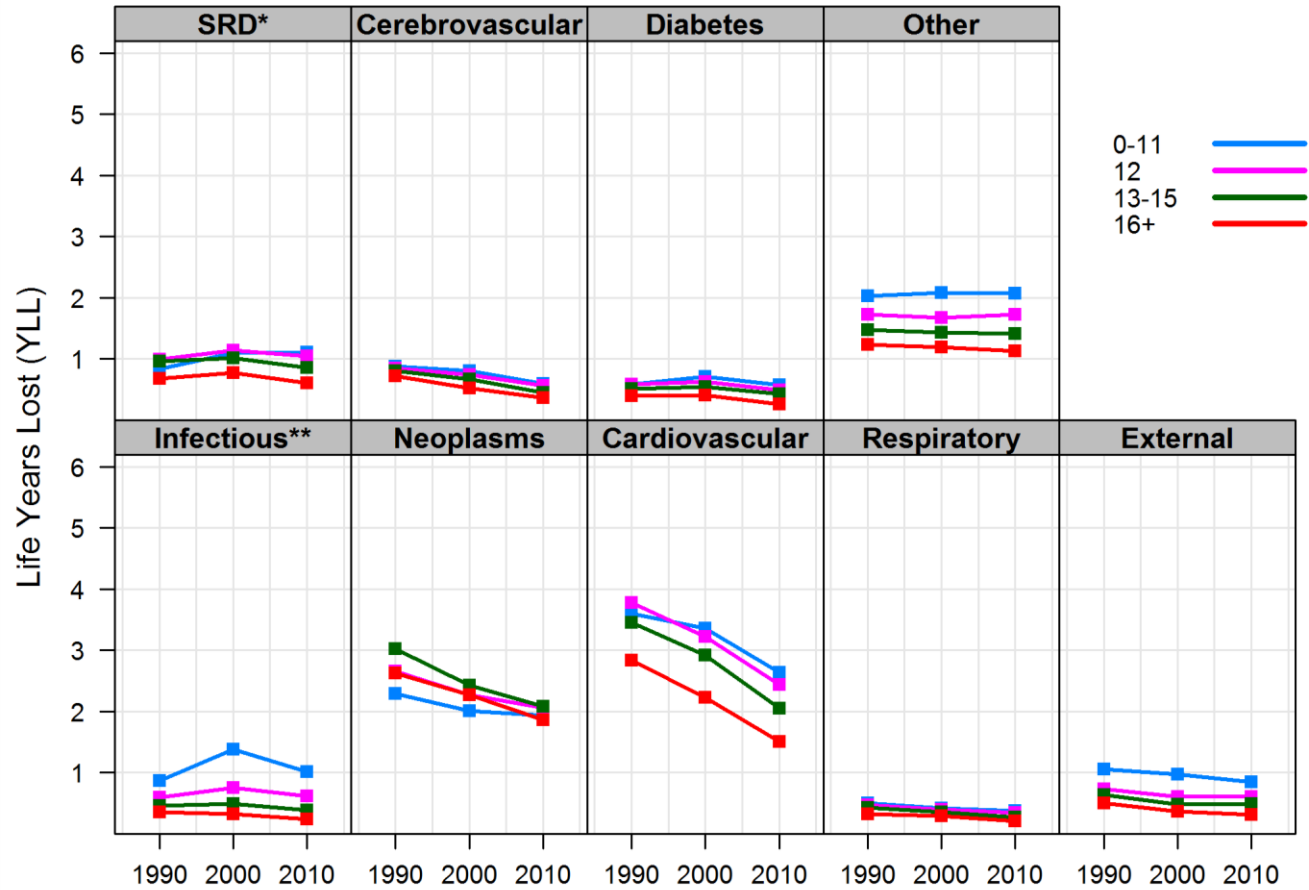

Note: \* SRD = smoking-related diseases (bronchitis, emphysema, chronic airway obstruction and cancers of the lip, oral cavity, pharynx, esophagus, larynx, trachea, lung, and bronchus); \*\* Infectious and parasitic diseases.

Fig S3.4. Life years lost between ages 25 and 85 by cause of death and years of schooling, non-Hispanic black men.

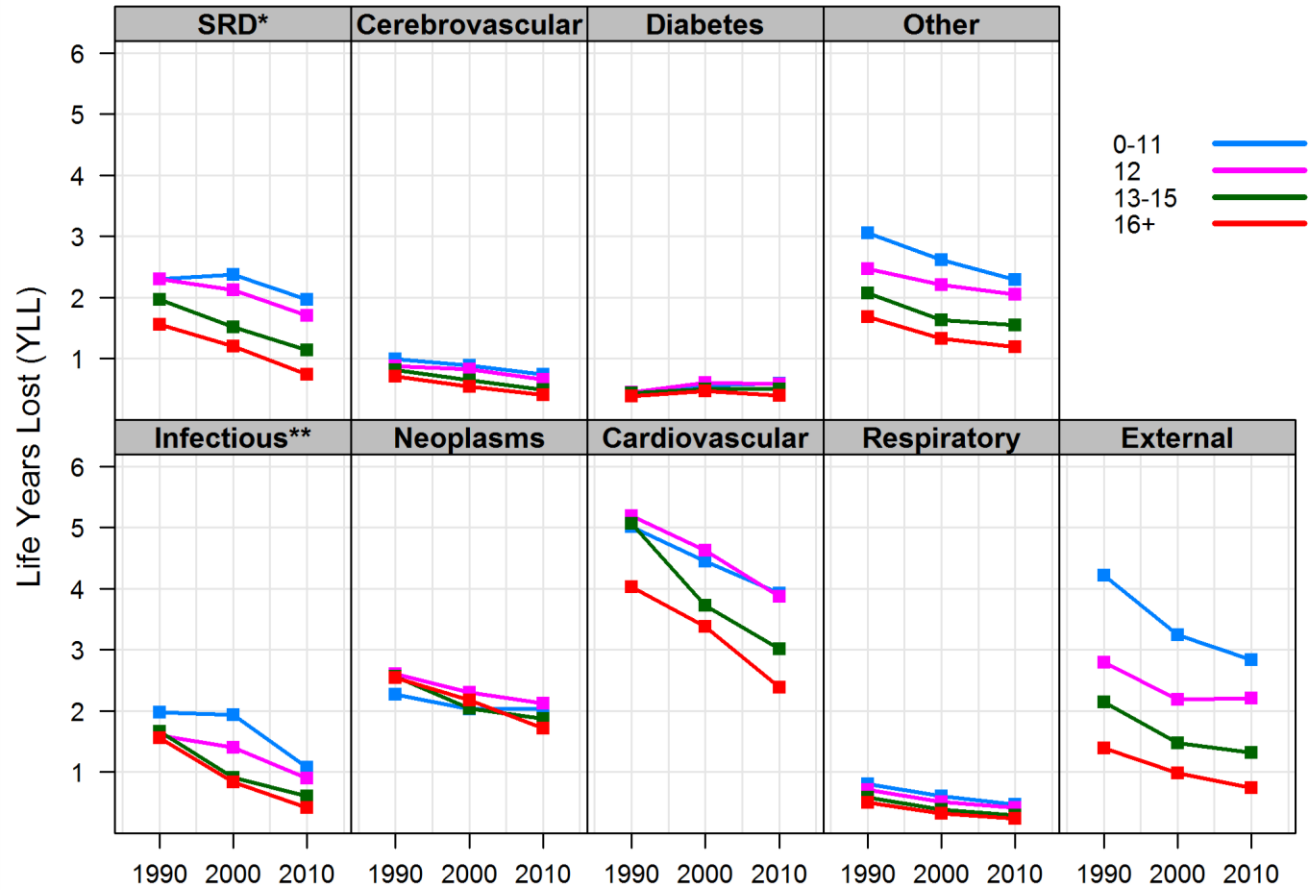

Note: \* SRD = smoking-related diseases (bronchitis, emphysema, chronic airway obstruction and cancers of the lip, oral cavity, pharynx, esophagus, larynx, trachea, lung, and bronchus); \*\* Infectious and parasitic diseases.
